# Supplementary material for: Whole-transcriptome RNA sequencing reveals the global molecular responses and ceRNA regulatory network of mRNAs, lncRNAs, miRNAs and circRNAs in response to copper toxicity in Ziyang Xiangcheng (Citrus junos Sieb. Ex Tanaka)
Source: BMC Plant Biol. 2019 Nov 21;19:509. doi: 10.1186/s12870-019-2087-1 (PMC6873749; doi:10.1186/s12870-019-2087-1)
Supplement: Supplementary file 9 — Additional file 9: Table S9. List of primers used in qRT-PCR. [file 12870_2019_2087_MOESM9_ESM.xlsx]

## Sheet: Sheet1
Table S9 list of primers used in qRT-PCR
mRNAs	Forward primer	Reverse Primer
Cg1g001620	TGGACTTGTCCTGGAGACCA	CAGCCCCAGCGAAGAAAAAC
Cg1g009950	GAGACGACAGAAGCTTGGCT	GCCCAATGGTATTGGTGGGT
Cg1g015400	TTTATCCGCTGCTTCGACCA	TCTCGGTCACGGGATCTTCT
Cg2g001540	CAGAATGTGGTGCCGTGTTG	TCTTGCGCCGTCCATGTTAT
Cg2g013970	ACACTTAACTTGGGGCCTCG	ACGGGGGAAGATCTAGTGGT
Cg2g017030	ACAATTCGGGTCTGGTCCAT	CCAATTGTACACGCCGGTTG
Cg2g021840	TATCCTGGTGCCTTCGGAGA	GCTTCCAAGCCAAATGCCTC
Cg2g034240	CAGCTGCAAGCACAAGAGTC	CACATGCCGGCTAGCATAGA
Cg2g047100	GCCATGTCGGTTTTGGTTGG	AGCCCTTTGTACCACCATGA
Cg3g011050	AGAGATCCGTTCAGGAGGCT	ATCATCCGGGCGTAACATCC
Cg3g013430	TTTGTGCGGTTGCATTAGGC	TGGTGAAAAACCTGCCCCAT
Cg3g013610	TCTGTCGGCTGCTTTAGACG	GTTTACACCCTCCAAGCCCA
Cg3g013620	ACACTTGACAGAGCTCGGTATT	GCCCGACATTGATTCTCCCA
Cg3g024660	ACGTTTTCGCAAGCTGCAAT	AGCAATCCCAGCAATCACCA
Cg3g024680	AGCATCAAGGCCACACTCAA	ACCCATCATCACCACCAAGC
Cg4g001090	AACCGGTATTTCCGGCATGT	CCGCTAGAATAGCCAAGGCA
Cg4g021370	CGAAGAGTGCTTGTATGAGTTTGGG	TGTAAGCTCTGTGACGATTTCACT
Cg5g000690	CTTGGATTGTTGCGGGGTTC	CCCATAAATGCAAGCCCAGC
Cg5g001820	TGGGTCTGTGCGGTACAATC	CACAACTGCACTACACTCGC
Cg5g003300	GGCTGAGTGTTGCCATTTCA	AGTGAGGGAGAGTACTGGTGA
Cg5g008640	ACAGATAACAGCAGGGGCAC	CCAAGATTGCAGTCCATGCG
Cg5g011170	GCCAGTCCAAAGGGCGATAA	TGGGCCATTGGGGATTTGAA
Cg5g018290	GCTTACCTGGAATCCATGCCT	TTTTCCCACCGAGGAGCAAG
Cg5g026950	TGTGTTATAAAGCGGCCTCC	TGATCAAAGGCTGTTTCTCTGC
Cg5g033620	ACACTTGACAGAGCTCGGTATT	GCCCGACATTGATTCTCCCA
Cg6g001870	GTTGGAGTTCCGACTGGAGG	ATCGCTGCTTCTTGAAGGCT
Cg6g005760	TTGGCCTGAAAGGAGTCTCG	GCTTGAATCAACAGGGCAGC
Cg6g006410	ATAGCTCCAGGCCAAACCAC	AGTAGTGTAACGTGGCGGTG
Cg6g016050	TATCAGCCGCCAGACCAGAA	TACCCGAGTAAAGGAGGCAGTA
Cg6g016060	TCTACTCAGCATGGCTTCGTC	TTCAATGCCTGCCGAAAGAG
Cg6g016070	CAGCGAGCATCTGGACATGA	TTCAGCAGCCCCAACAGTTT
Cg6g016780	ACAGAGCCTCAACCAAAGGG	TCCGGCTAAATCGTACTCGC
Cg6g020410	GCACACTCCGACTTCTCACA	GAGGGGATAGAACCCCCAGA
Cg7g000950	GTCCTGGCCAAACCACAAAC	CGCAAGAAAGCAATTCCGGT
Cg7g005630	CCTATCAGGCGTCGTTCCTC	CGGGTGATGAAGAAGCCACT
Cg7g023250	CAAGCAGGAGGACTTGGGAG	ATTCTTCAGGGGCAGTGTGC
Cg7g023310	ACAAGTCTGGCAATTCTAGCTG	ACAACAAGAGCAAGCCCCAA
Cg8g001210	TCTTGGTCAGCTTGGGTTCC	CTGCGAAAAGATGGGGTTGC
Cg8g024350	TGTCTGAGCTGTCGTGATGG	TCTACGGCACGTAAAACGCT
Cg8g024760	CCAGAAACTACTGGGGACCG	TGCCTTGCCAATTCACATGC
Cg9g000380	TCAGAAAGGATGGTCCTGCC	TCAACCGGTTCACCAACTCT
Cg9g005370	AGAGGTTAGGCCAGAGGTCA	CAGCATCCCAGTTAGCCCAA
Cg9g005380	TCAGAACCGGCTGAATTGCT	GCGGGTGATCATCCCTTGAT
Cg9g026500	TGTTGTGCCCTGTGACTTGT	GATCCTCCTTGAGAGCGTCG
Cg9g027310	TAACGGGACTTTGGTCAGGC	TCGTGGATGATGTTTGCCCA
lncRNAs	Forward primer	Reverse Primer
TCONS_00012501	AGCAACATGCGGACATTGTG	TCGGAAGAGCCCCTAACCAT
TCONS_00012960	AGCCAGGAGAAAGGAGAAGGA	TCAGTTCGGCAAAGCACAAC
TCONS_00027274	GCGAGACTCGATCAGGGAAG	CTCAAGGAGGCAAGAGCCAT
TCONS_00025983	TCTTCATTCACGCTTCCCTT	CTCTGTCGCCATCCACATCA
TCONS_00034874	CCCAACGCAGGAGAGCAATA	GATCGGCATGCAAACACAGG
TCONS_00036810	TTCACTGCTGCTTGTCAGGT	TTGCTTGAAAGCTACATTGTGT
TCONS_00051884	AATCTCACGGAAGGGCACTG	CTGCTTCTCCATACCCGACC
miRNA	Primer
miR166a-5p	GGGCGGAATGTTGTCTGGT
miR165a-5p	GGTGGCGGAATGTTGTCTG
miR398b	GGTGGCTGTGTTCTCAGGT
miR157c-3p	GGCTTGGCTCTCTATACTTC
miR8175	CTATGGATCCCCGGCAACG
NOV-m0284-5p	GGTCTGTGCACAATAAGCCG
miR535c	GCGCGTGACAACGAGAGAGA
U6	ACAGAGAAGATTAGCATGGCC	GACCATTTCTCGATTTGTGCG
